# Supplementary material for: Distribution Analyzer, a methodology for identifying and clustering outlier conditions from single-cell distributions, and its application to a Nanog reporter RNAi screen
Source: PubMed Central journal article supplement (PMC4511455; doi:10.1186/s12859-015-0636-7), 2015-07-22
Supplement: 12859_2015_636_MOESM10_ESM.pdf [file 12859_2015_636_MOESM10_ESM.pdf]

### Cluster by Kolmogorov-Smirnov Score

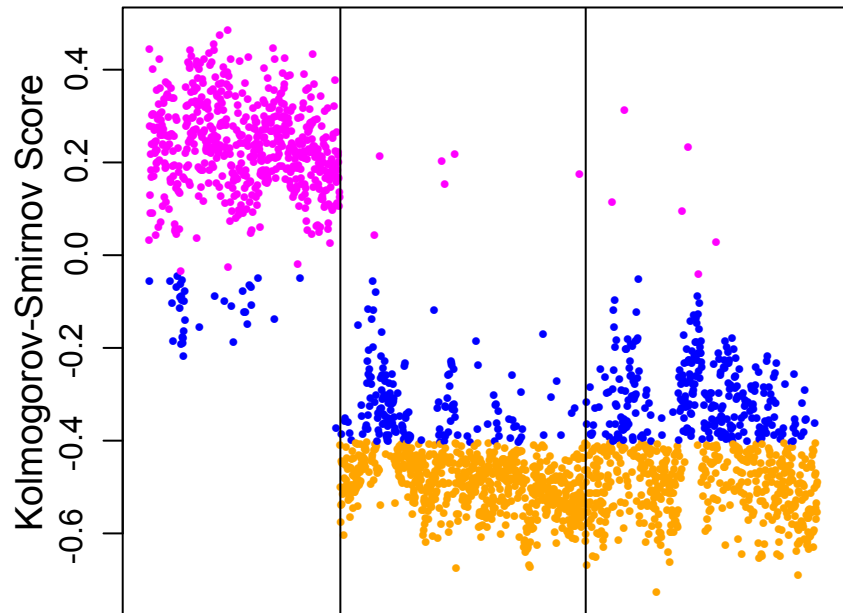

siNik

siGFP

siSox2

Cluster 1

593

6

6

Cluster 2

37

162

292

Cluster 3

0

641

468

### Cluster by Distribution

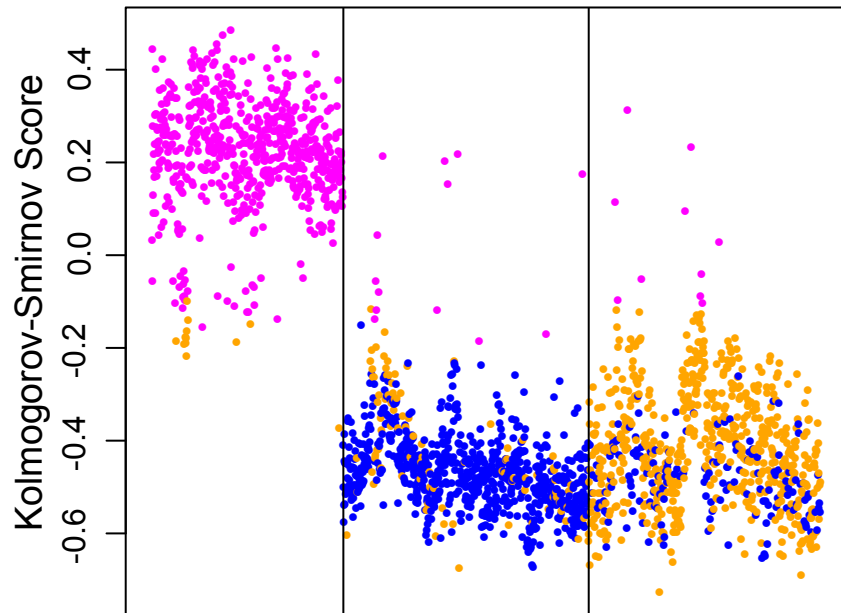

siNik

siGFP

siSox2

Cluster 1

618

13

10

Cluster 2

0

703

156

Cluster 3

12

93

600
