# Supplementary material for: Distribution Analyzer, a methodology for identifying and clustering outlier conditions from single-cell distributions, and its application to a Nanog reporter RNAi screen
Source: PubMed Central journal article supplement (PMC4511455; doi:10.1186/s12859-015-0636-7), 2015-07-22

## Cluster 1

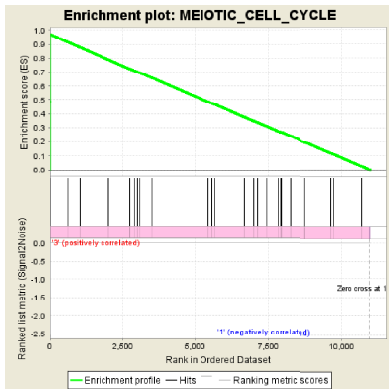

## Cluster 2

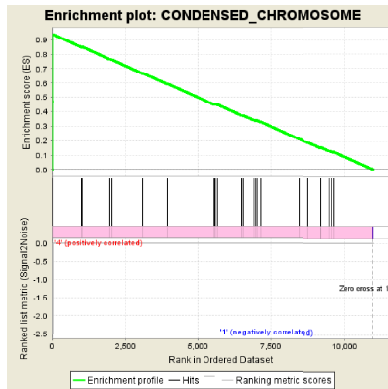

## Cluster 3

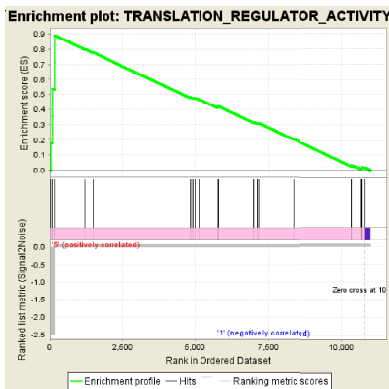

## Cluster 4

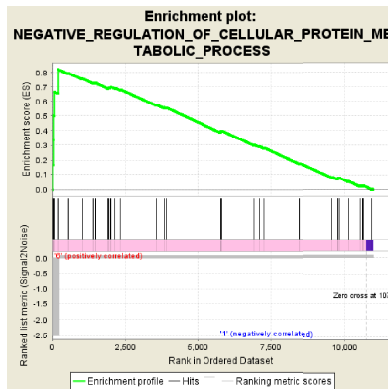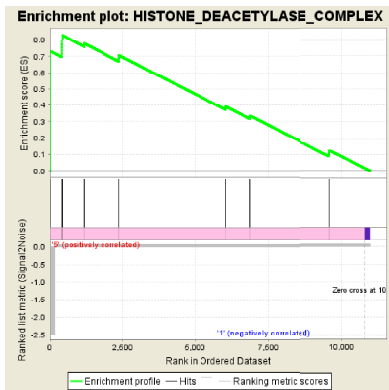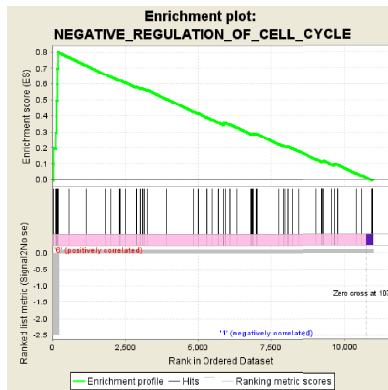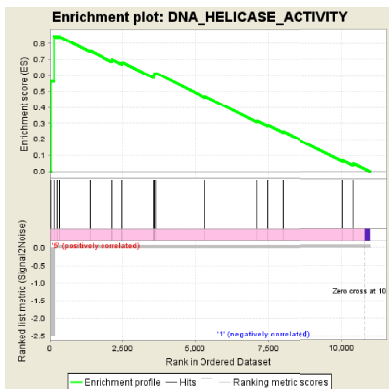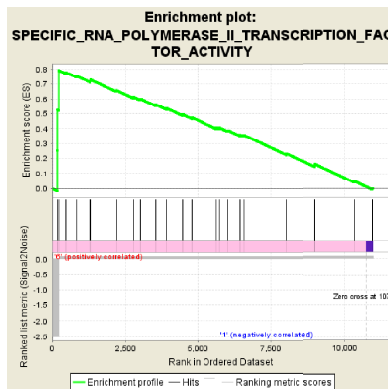

Supplement: 12859_2015_636_MOESM14_ESM.pdf [file 12859_2015_636_MOESM14_ESM.pdf]
